# Supplementary material
Source: PubMed Central journal article supplement (PMC4226217)
Supplement: NIHMS637912-supplement-supp_table.pdf [file NIHMS637912-supplement-supp_table.pdf]

**Table S1.** Mean % Methylation and Standard Deviations (SD) at Individual CpGs for EVX1, CAV1, and FGF1

| <i>Gene</i> | <i>CG position</i> | <i>*NTA (% Methylation)</i> | <i>SD</i> | <i>*TA (%Methylation)</i> | <i>SD</i> | <i>p-value (Wilcoxin Rank Sum)</i> | <i>p-value (t-test)</i> |
|-------------|--------------------|-----------------------------|-----------|---------------------------|-----------|------------------------------------|-------------------------|
| EVX1        | CG1                | 30.3                        | 8.8       | 41.3                      | 14.5      | 0.011                              | 0.019                   |
|             | CG2                | 28                          | 8.2       | 37.9                      | 12.5      | 0.016                              | 0.016                   |
|             | CG3                | 22.5                        | 7         | 32.3                      | 10.1      | 0.003                              | 0.004                   |
|             | CG4                | 49.7                        | 14.1      | 59.6                      | 13.1      | 0.058                              | 0.029                   |
|             | CG5                | 46.2                        | 15        | 56.4                      | 11.8      | 0.052                              | 0.018                   |
|             | CG6                | 37                          | 13.6      | 48.1                      | 12        | 0.022                              | 0.01                    |
| CAV1        | CG1                | 4.9                         | 4.1       | 9                         | 5.1       | 0.029                              | 0.016                   |
|             | CG2                | 13.8                        | 7.2       | 22.5                      | 8.8       | 0.011                              | 0.003                   |
|             | CG3                | 16.9                        | 8.5       | 28.3                      | 10        | 0.001                              | 0.001                   |
|             | CG4                | 13.2                        | 7.3       | 24.3                      | 11.2      | 0.002                              | 0.003                   |
|             | CG5                | 14.6                        | 8.8       | 25.5                      | 9.3       | 0.004                              | 0.001                   |
|             | CG6                | 14.4                        | 5.3       | 24.1                      | 11        | 0.003                              | 0.006                   |
|             | CG7                | 18.4                        | 8.8       | 29.1                      | 10.2      | 0.003                              | 0.002                   |
|             | CG8                | 8.2                         | 4.9       | 14.4                      | 5.9       | 0.004                              | 0.002                   |
|             | CG9                | 15.2                        | 4.5       | 21.3                      | 7.7       | 0.005                              | 0.014                   |
|             | CG10               | 17.4                        | 5.3       | 25                        | 8.9       | 0.004                              | 0.009                   |
| FGF1        | CG1                | 82                          | 13.9      | 65.4                      | 11.6      | 0.001                              | 0.0001                  |
|             | CG2                | 72.2                        | 12.9      | 56.6                      | 11.5      | 0.001                              | 0.0001                  |
|             | CG3                | 81.6                        | 12.6      | 65.36                     | 12.2      | 0.001                              | 0.001                   |
|             | CG4                | 81.6                        | 12.1      | 65.4                      | 13.5      | 0.002                              | 0.001                   |

\*NTA = non-tumor associated; TA = tumor-associated
