# Supplementary material
Source: PubMed Central journal article supplement (PMC4226217)

Supplementary Figure S1

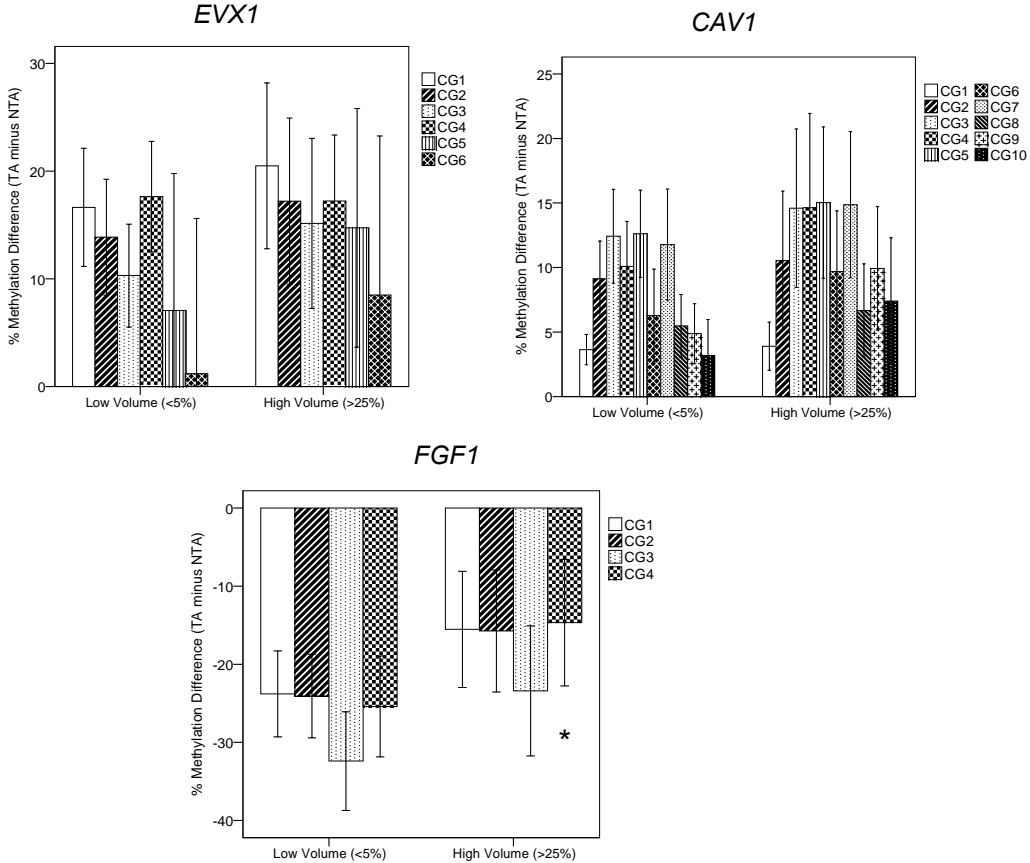

Supplement: NIHMS637912-supplement-supp_figure.pdf [file NIHMS637912-supplement-supp_figure.pdf]
